# Supplementary material for: Stevia (Stevia rebaudiana) extract ameliorates insulin resistance by regulating mitochondrial function and oxidative stress in the skeletal muscle of db/db mice
Source: Springer Nature journal article supplement (doi:10.1186/s12906-023-04033-5), 2023-07-24

Original images for Blots - Figure 5.

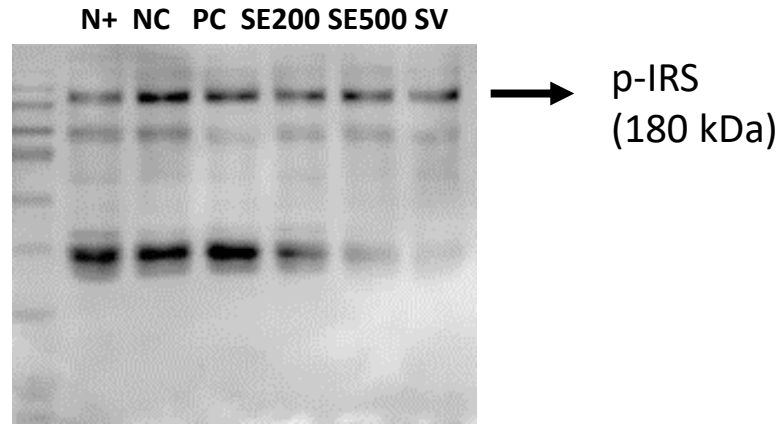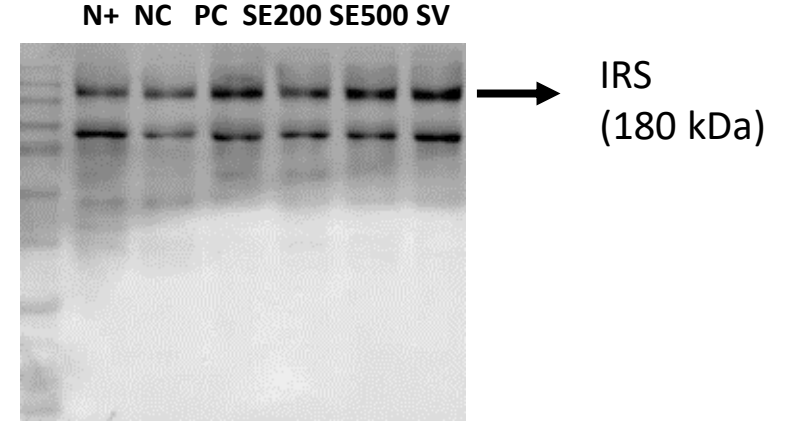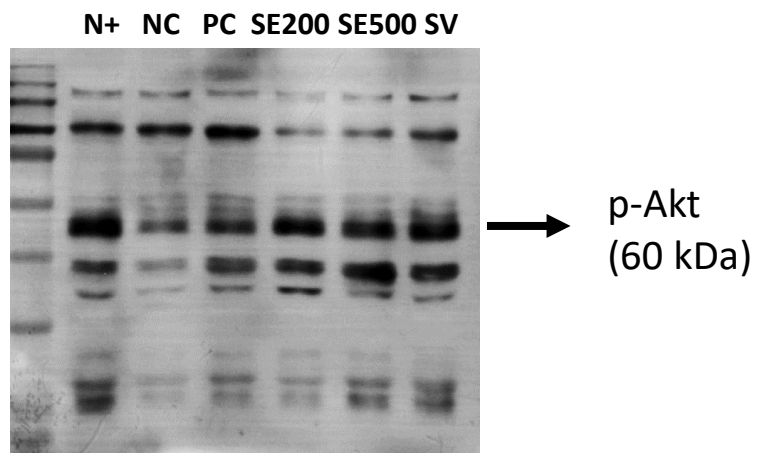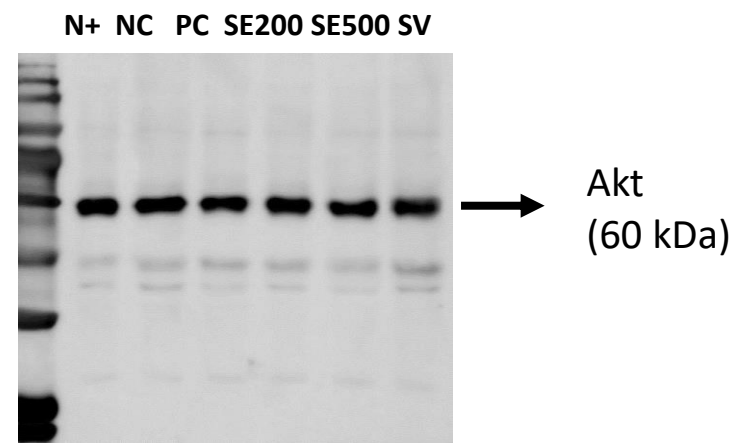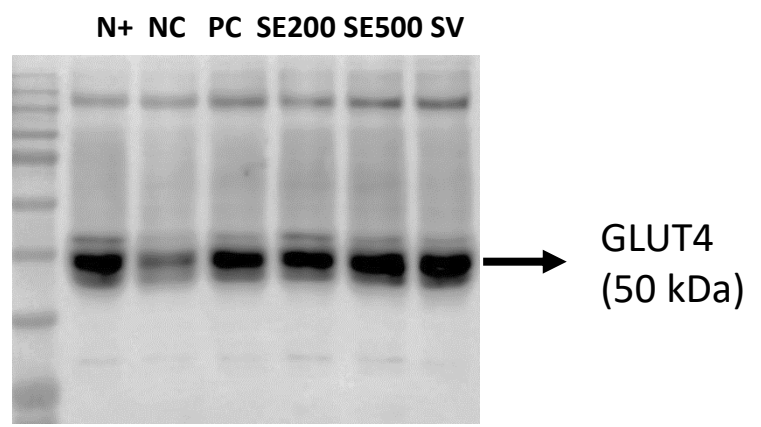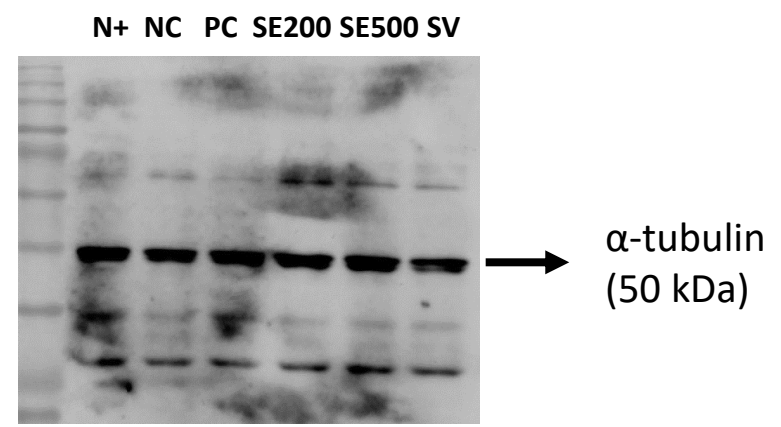

Original images for Blots - Figure 6.

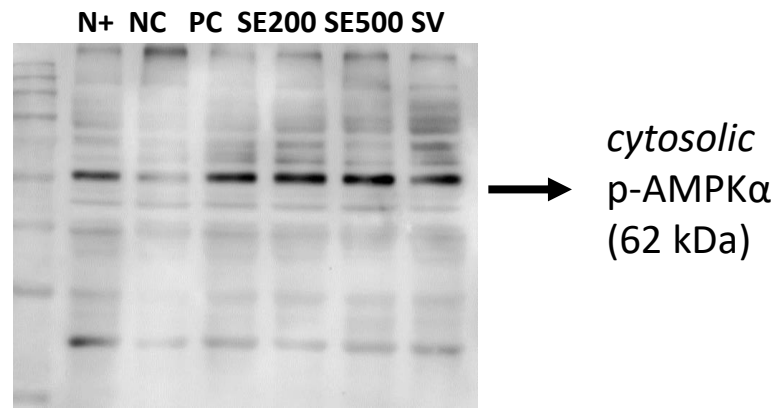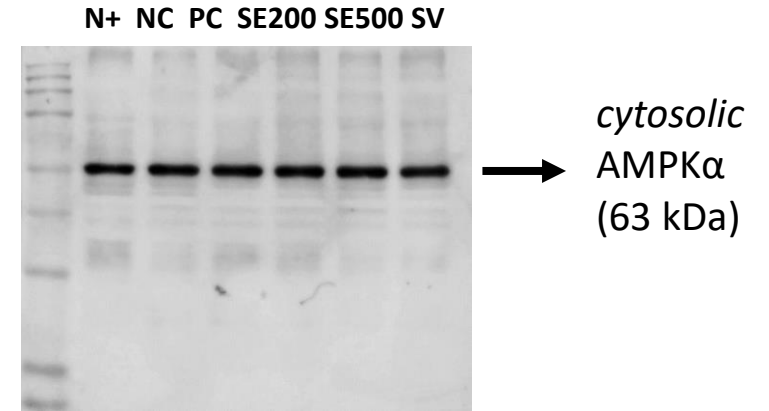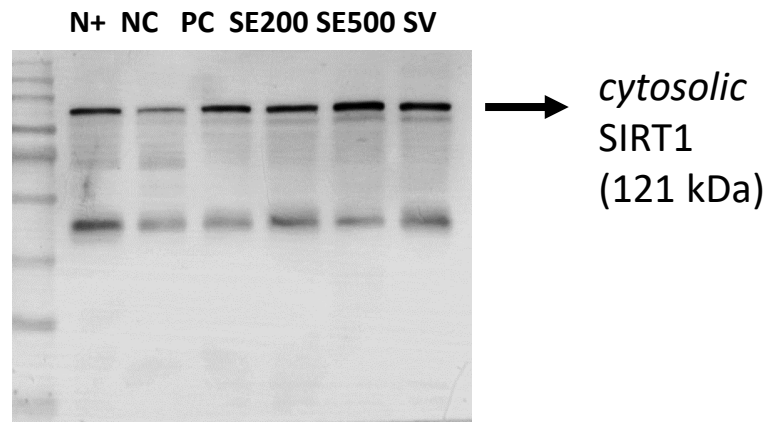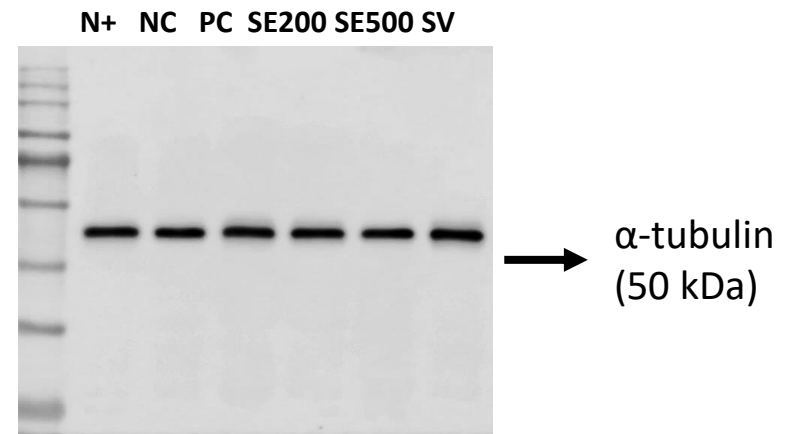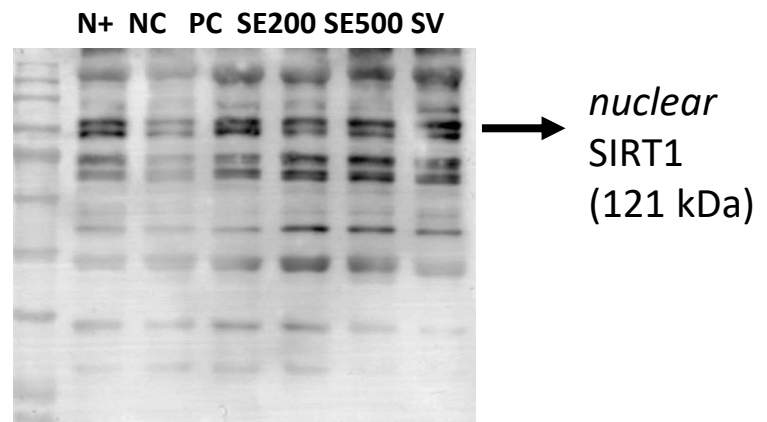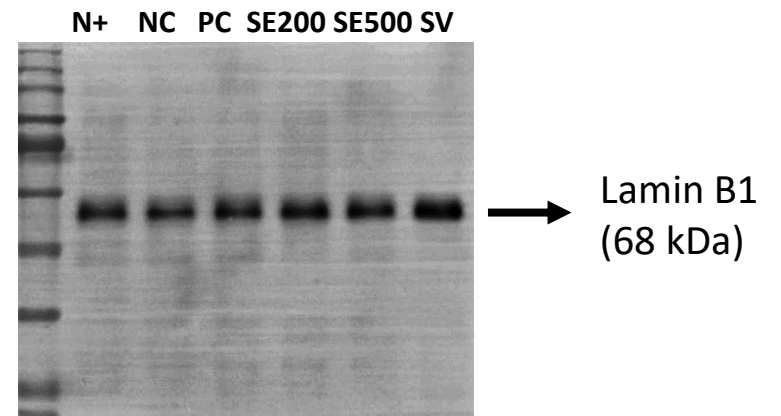

Original images for Blots - Figure 6.

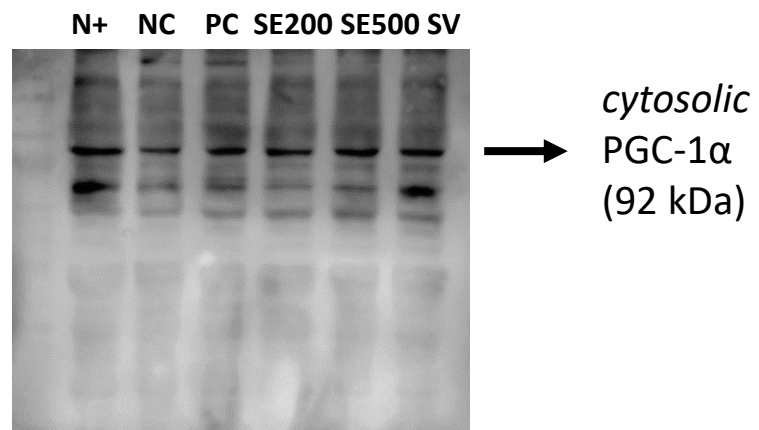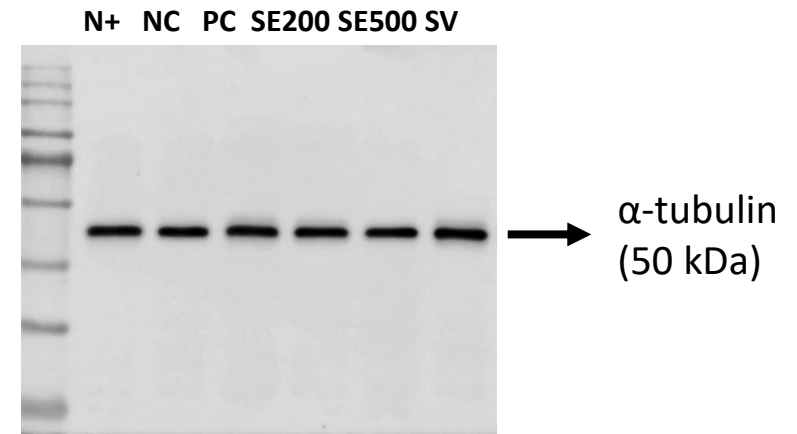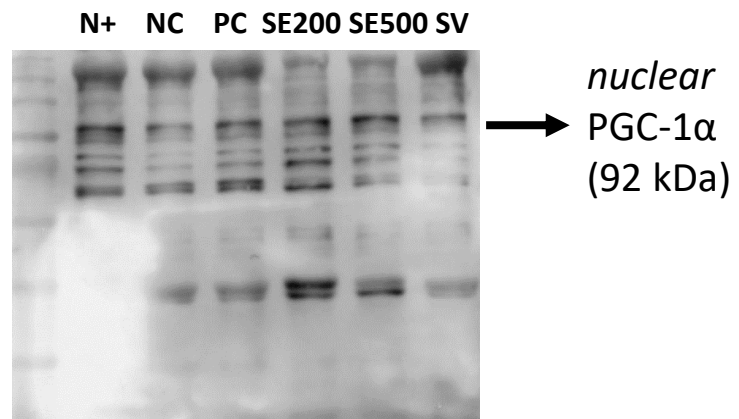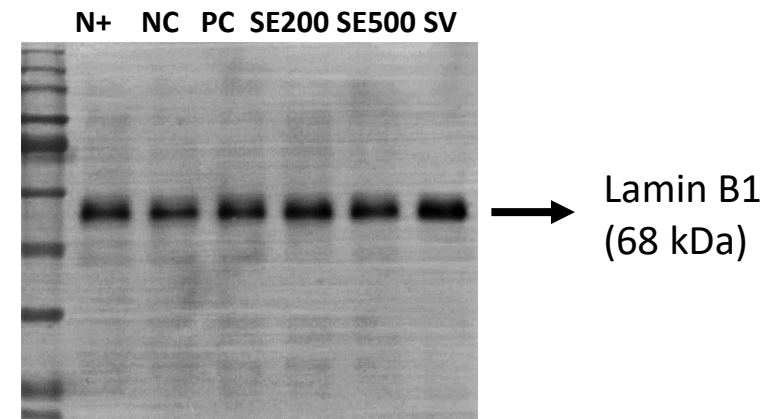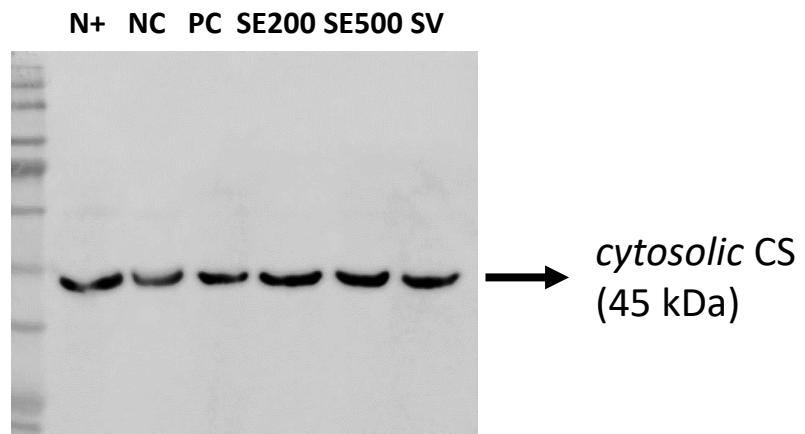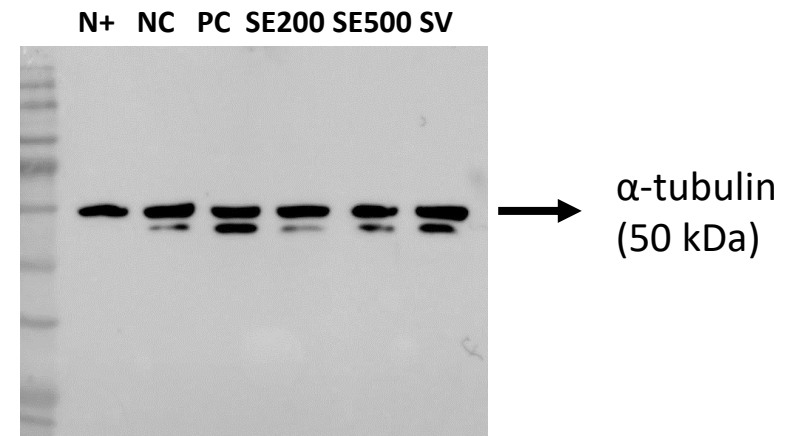

Original images for Blots - Figure 7.

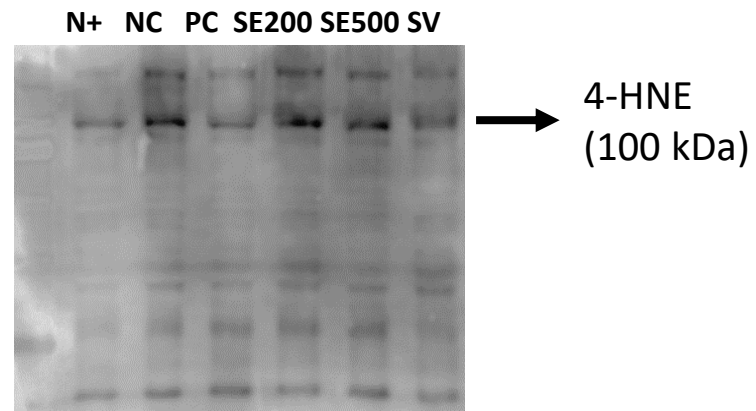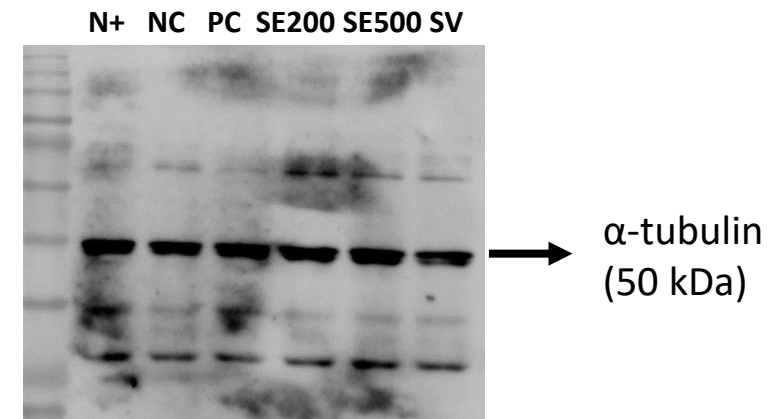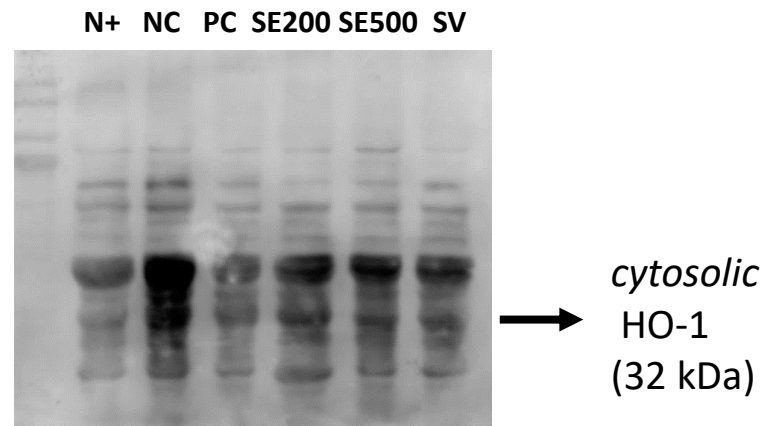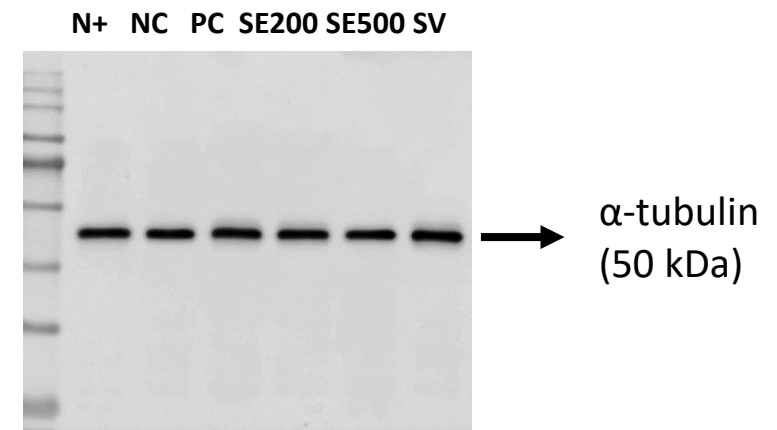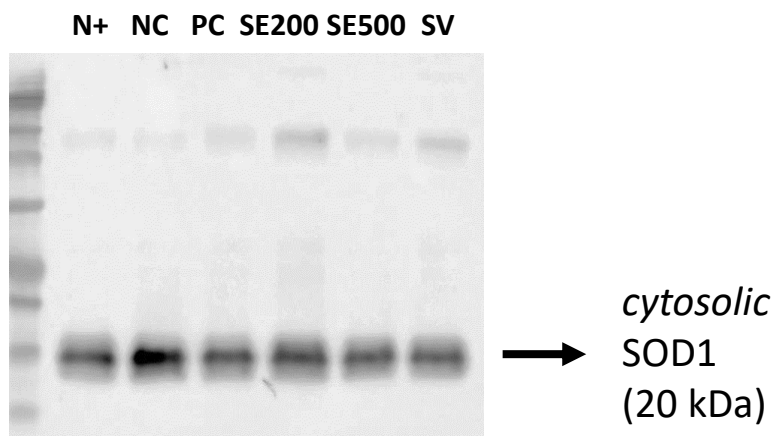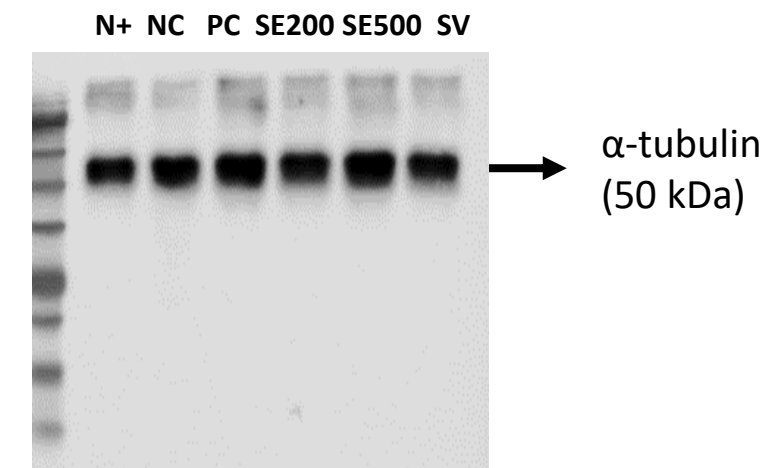

Original images for Blots - Figure 7.

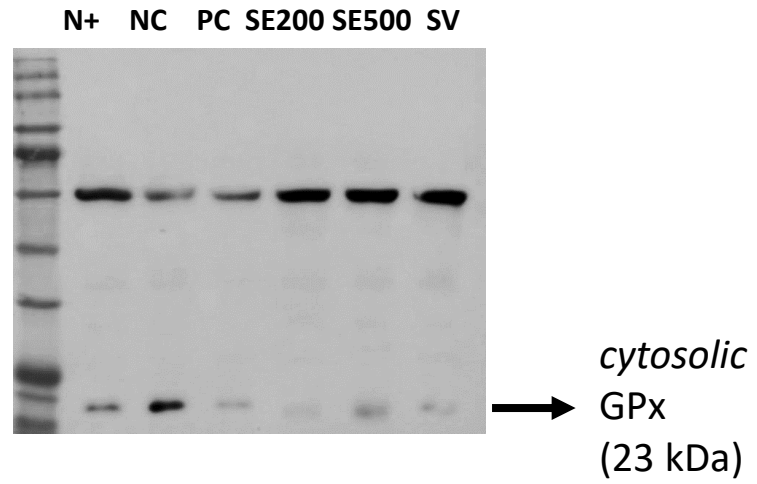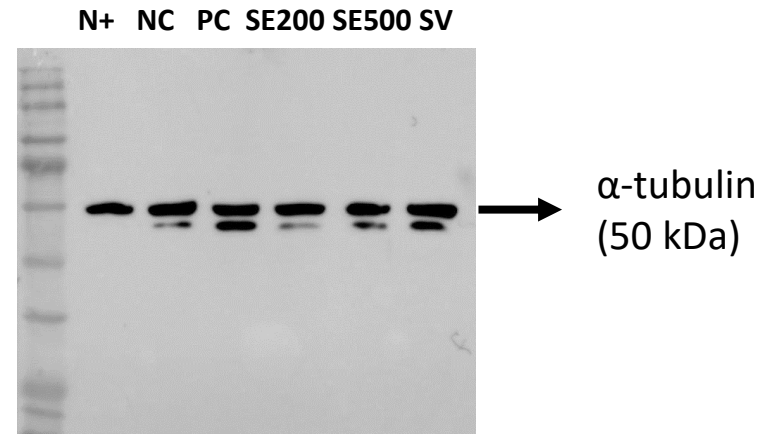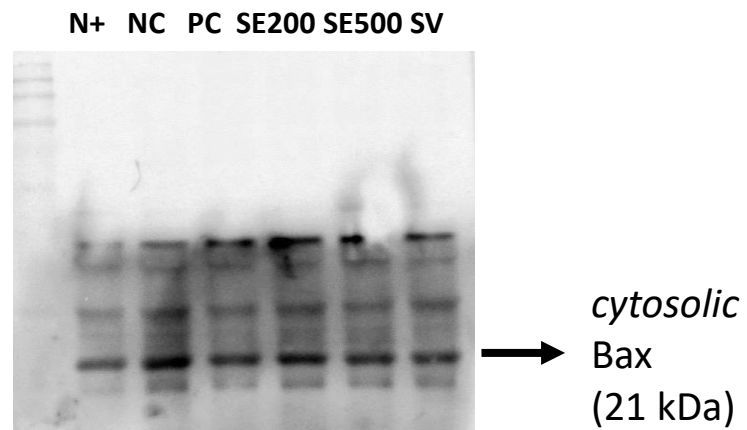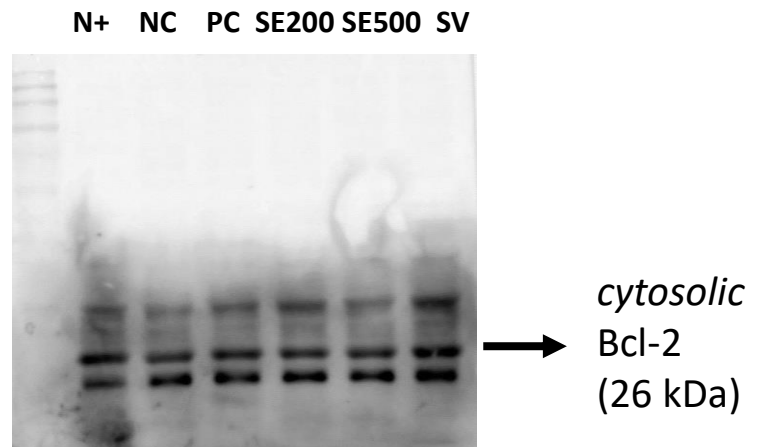

Supplement: MOESM3 [file 25838776]
